# Supplementary material for: Targeting Nrf2 and NF-κB Signaling Pathways in Inflammatory Pain: The Role of Polyphenols from Thinned Apples
Source: MDPI journal article supplement (doi:10.3390/molecules28145376), 2023-07-13
Supplement: s1 [file s1]

## Supplementary Materials

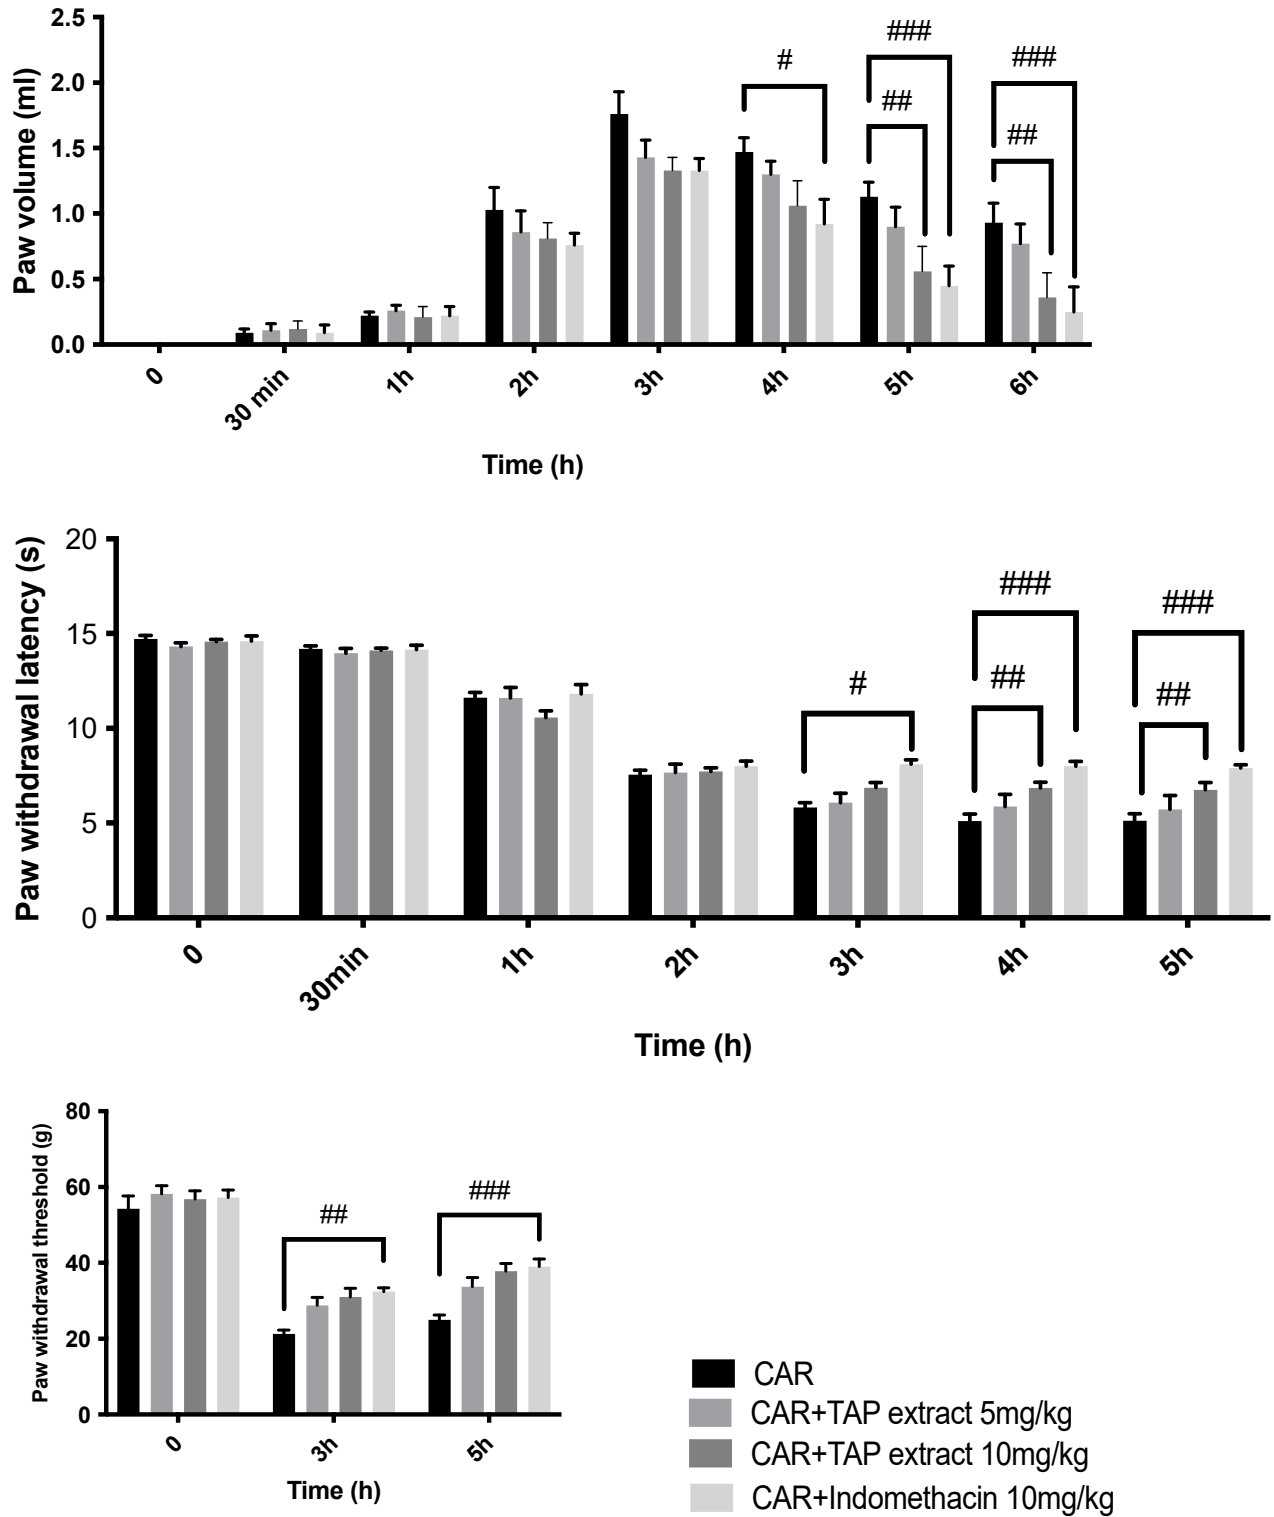

**Figure S1.** Evaluation of the effects of TAP extract on CAR-induced inflammation and pain. Paw volume; Von Frey test; plantar test. Data are expressed as means  $\pm$  SEM of 6 animals for each group. # p < 0.05 vs. CAR; ## p < 0.01 vs. CAR; ### p < 0.001 vs. CAR.

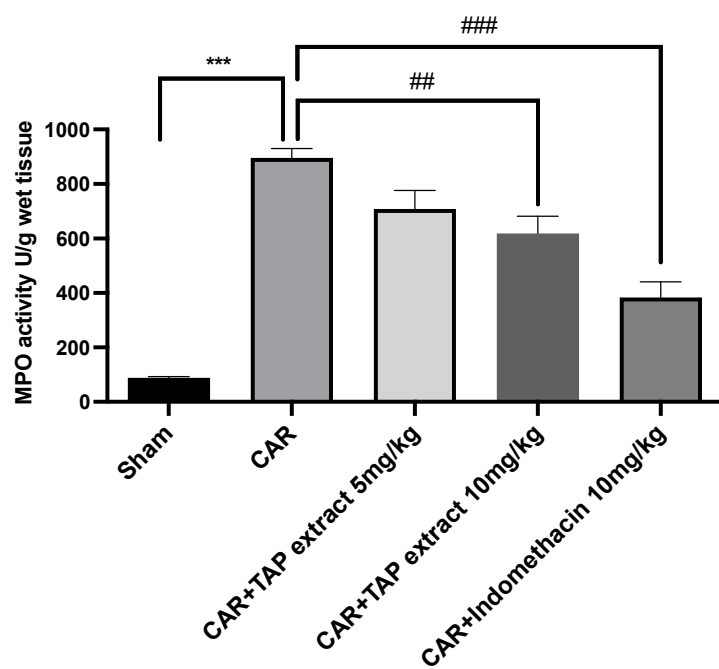

**Figure S2.** MPO analysis. Values are means  $\pm$  SEM of 6 animals for each group. \*\*\*  $p < 0.001$  vs. sham; ##  $p < 0.01$  vs. CAR; ###  $p < 0.001$  vs. CAR.

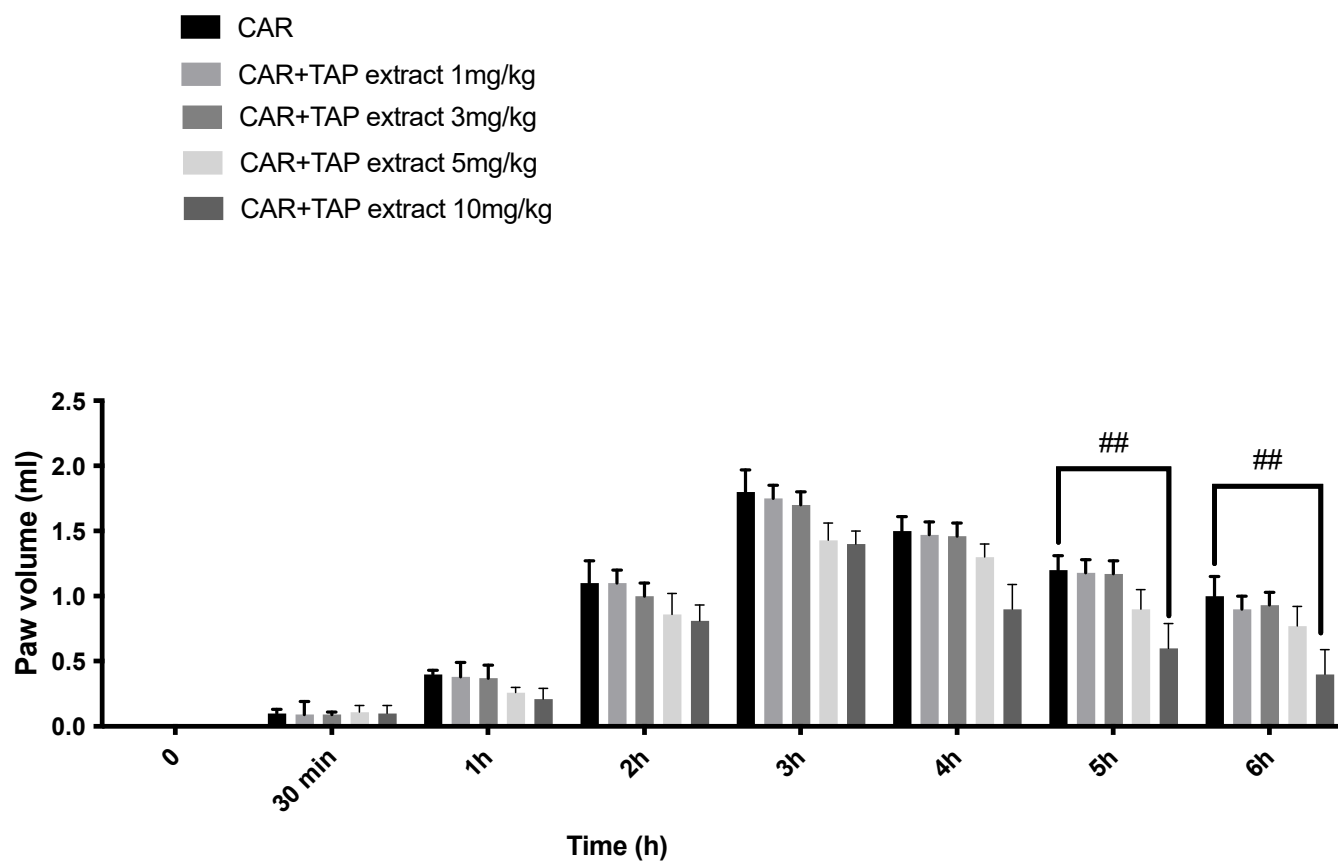

**Figure S3:** Preliminary results on the effect of dose response of TAP extract. Paw volume; Data are expressed as means  $\pm$  SEM of 6 animals for each group. ##  $p < 0.01$  vs. CAR;

**Table 1.** Qualitative profile of the TAP extract.

| <i>Organic and Phenolic Acids</i>                       |                                                                         |
|---------------------------------------------------------|-------------------------------------------------------------------------|
| <b>Citric acid</b>                                      | <b>Caffeic acid</b>                                                     |
| Protocatechuic acid glucoside                           | Ferulic acid-O-glucoside isomer 1                                       |
| Caffeoylquinic acid isomer 1                            | <i>p</i> -Coumaric acid-O-glucoside isomer 3                            |
| Protocatechuic acid                                     | Ferulic acid-O-glucoside isomer 2                                       |
| Glutathionyl chlorogenic acid                           | Coumaroylquinic acid isomer 2                                           |
| Caffeoyl glucoside isomer 1                             | Ferulic acid-O-glucoside isomer 3                                       |
| Caffeoyl glucoside isomer 2                             | <i>p</i> -Coumaric Acid                                                 |
| Coumaroylquinic acid isomer 1                           | Dicaffeoylquinic acid                                                   |
| Caffeoyl glucoside isomer 3                             | 3-(benzoyloxy)-2-hydroxypropyl<br>glucopyranosiduronic acid             |
| Caffeoylquinic acid isomer 2                            | Sinapoyl hexoside                                                       |
| <i>p</i> -Coumaric acid-O-glucoside isomer 1            | 3-[2,4,5-trihydroxy-3-(3-methylbut-2-en-1-yl)<br>phenyl] propanoic acid |
| <i>p</i> -Coumaric acid-O-glucoside isomer 2            |                                                                         |
| <i>Flavanols</i>                                        |                                                                         |
| Catechin                                                | Procyanidin pentamer                                                    |
| Procyanidin B2                                          | Procyanidin hexamer                                                     |
| Epicatechin                                             | Procyanidin heptamer                                                    |
| Procyanidin trimer                                      | Procyanidin octamer                                                     |
| Procyanidin tetramer                                    | Procyanidin nonamer                                                     |
| Procyanidin trimer                                      |                                                                         |
| <i>Flavanones</i>                                       |                                                                         |
| Naringenin glucoside (prunin)                           | Eriodictyol                                                             |
| Eriodictyol-hexoside                                    | Naringenin                                                              |
| Naringin (Naringenin 7-O-neohesperidoside)              | Eriodictyol 7-(6-trans- <i>p</i> -coumaroylglucoside)                   |
| <i>Flavonols</i>                                        |                                                                         |
| Kaempferol-glucoside                                    | Patuletin hexoside isomer 1                                             |
| Quercetin-3-O-glucoside                                 | Patuletin hexoside isomer 2                                             |
| Quercetin-3-O-galactoside                               | Patuletin hexoside isomer 3                                             |
| Quercetin pentoside isomer 1                            | Patuletin pentoside                                                     |
| Quercetin pentoside isomer 2                            | Patuletin rhamnoside                                                    |
| Quercetin pentoside isomer 3                            | Isorhamnetin rhamnoside                                                 |
| Quercetin-3-O-rhamnoside                                | Kaempferol rhamnoside                                                   |
| Quercetin                                               | Methoxyquercetin (patuletin)                                            |
| Kaempferol                                              | Quercetin 3-(3- <i>p</i> -coumaroylglucoside)                           |
| Isorhamnetin                                            |                                                                         |
| <i>Dihydrochalcones</i>                                 |                                                                         |
| Hydroxyphloretin glucoside                              | Phloridzin                                                              |
| Phloretin-O-xyloglucoside isomer 1                      | Phloretin                                                               |
| Phloretin-O-xyloglucoside isomer 2                      |                                                                         |
| <i>Flavones</i>                                         |                                                                         |
| Luteolin                                                |                                                                         |
| <i>Triterpenoids</i>                                    |                                                                         |
| Euscaphic acid                                          |                                                                         |
| <i>Lipids</i>                                           |                                                                         |
| (10E,15Z)-9,12,13-Trihydroxy-10,15-octadecadienoic acid | Trihydroxy-octadecenoic acid                                            |
